# Supplementary material for: A Low-Cost, Portable Device for Detecting and Sorting Aflatoxin-Contaminated Maize Kernels
Source: MDPI journal article supplement (doi:10.3390/toxins15030197), 2023-03-04
Supplement: s1 [file s1]

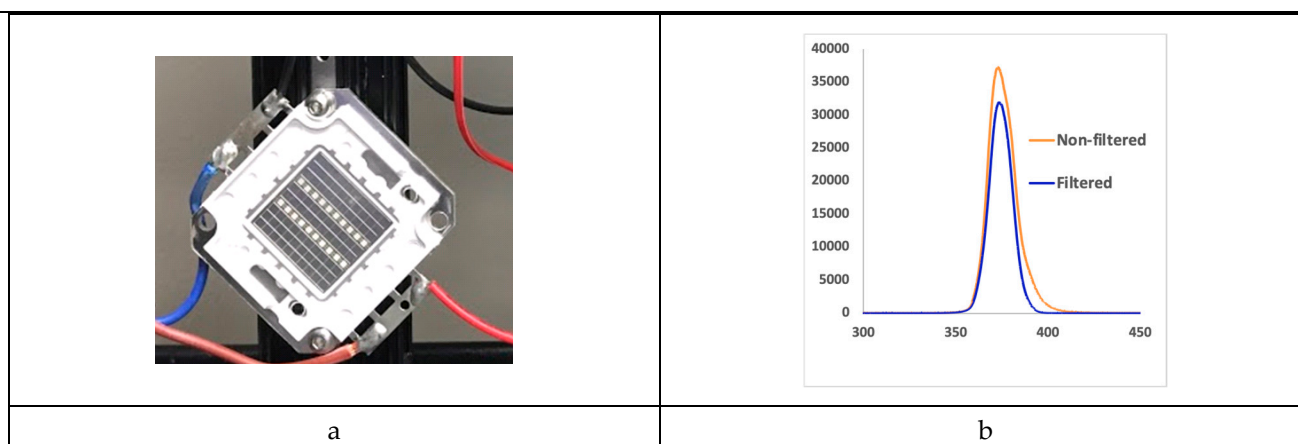

**Figure S1.** UV-LED properties. One 20 W UV-LED chip is embedded with 20 × 1 W UV-LEDs. The UV-LED light was filtered by 365 nm excitation filter. The spectral data was collected with an Avantes (Apeldoorn, Netherlands) UV-Visible spectrometer. **a** .UV-LED chip with 20 1-w LEDs, **b**. UV-LED Spectra (in nm).

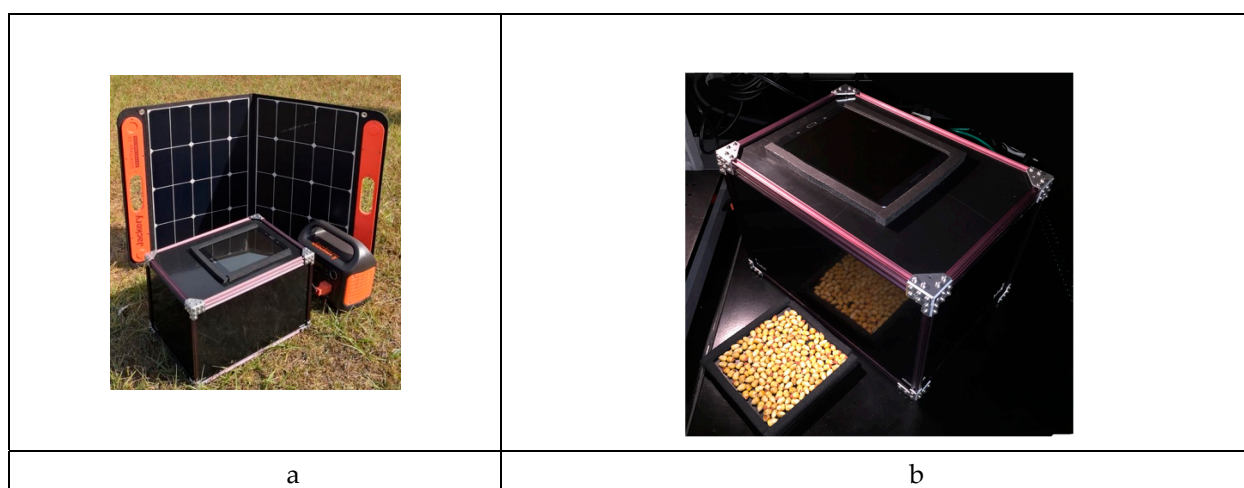

**Figure S2.** The prototype portable aflatoxin contamination detection device employs a tablet for fluorescence imaging of maize samples. **a**. Device with solar power, **b**. Prototype detection device with sample tray.

### Equations used in Analysis:

Detection accuracy is defined in equation S1:

$$\text{Detection Accuracy} = \frac{\text{Number of correctly detected samples}}{\text{Total number of samples}} \times 100\% \quad (\text{S1})$$

Aflatoxin reduction ratio was calculated for each experiment. In this case, each experiment was regarded as a maize lot, each weighing approximately 5 kg. Thus, the reduction ratio is described in equation S2:

$$\text{Aflatoxin reduction Ratio} = \frac{\text{Average Original lot ppb} - \text{Average Clean lot ppb}}{\text{Average Original lot ppb}} \times 100\% \quad (\text{S2})$$

$$\text{Orig. Sample ppb} = \frac{\text{Weight}_{\text{positive}} \times \text{ppb}_{\text{positive}} + \text{Weight}_{\text{negative}} \times \text{ppb}_{\text{negative}}}{\text{Total sample weight}} \quad (\text{S3})$$

$$\text{Rejection ratio} = \frac{\text{Total rejected Weight}}{\text{Total lot weight}} \times 100\% \quad (\text{S4})$$

Where the “Total rejected weight” was the pooled weight of all rejected samples from one experiment.
